# Supplementary material for: Recent Trends in the Diagnostic and Surgical Management of Benign Prostatic Hyperplasia in the U.S. from 2004 to 2017: Annual Changes in the Selection of Treatment Options and Medical Costs
Source: MDPI journal article supplement (doi:10.3390/app12178697), 2022-08-30
Supplement: s1 [file s1]

Archive with 1 entries (1 files):
- applsci-1842509-supplementary.pdf
